# Supplementary material for: Microbiome in the nasopharynx: Insights into the impact of COVID-19 severity
Source: PubMed Central journal article supplement — Heliyon. 2024 May 18;10(10):e31562. doi: 10.1016/j.heliyon.2024.e31562 (PMC11141365; doi:10.1016/j.heliyon.2024.e31562), 2024-05-18
Supplement: mmc1.pdf [file mmc1.pdf]

Supplementary 1 MATERIALS AND METHODS

**KEY RESOURCES TABLE**

| RESOURCE                                 | SOURCE                        | IDENTIFIER / WEBSITE                                                                                                                                      |
|------------------------------------------|-------------------------------|-----------------------------------------------------------------------------------------------------------------------------------------------------------|
| <b>Nasopharyngeal swab</b>               |                               |                                                                                                                                                           |
| Nasopharyngeal swab                      | COPAN                         | COPAN Diagnostics 56380CS01                                                                                                                               |
| Transport medium UTM tubes               | COPAN                         | COPAN Diagnostics 3C075N                                                                                                                                  |
| <b>DNA extraction</b>                    |                               |                                                                                                                                                           |
| Sputolysin                               | Calbiochem                    | CAS 578517-Calbiochem                                                                                                                                     |
| QIAamp UCP Pathogen Mini Kit             | QIAGEN                        | Cat. No. / ID: 50214                                                                                                                                      |
| Pathogen Lysis Tubes L                   | QIAGEN                        | Cat. No. / ID: 19092                                                                                                                                      |
| <b>16S rRNA Amplicon PCR</b>             |                               |                                                                                                                                                           |
| Phusion Plus PCR Master Mix              | Thermo Fisher Scientific      | Cat. No. F631S                                                                                                                                            |
| 515f:<br>5'-GTGCCAGCMGCCGCGGTAA-3'       | López-Filoy et al., 2022 [23] | doi:10.3389/fcimb.2022.884272                                                                                                                             |
| 806r:<br>5'-GGACTACHVGGGTWTCTAAT-3'      | López-Filoy et al., 2022 [23] | doi:10.3389/fcimb.2022.884272                                                                                                                             |
| DNA Clean & Concentrator                 | Zymo                          | Cat. No. D4013                                                                                                                                            |
| <b>Sequencing</b>                        |                               |                                                                                                                                                           |
| Nextera XT Library Preparation Kit       | Illumina                      | FC-131-1096                                                                                                                                               |
| <b>Deposited data</b>                    |                               |                                                                                                                                                           |
| V4 region of 16S rRNA sequencing data    | This study                    | <a href="https://www.ncbi.nlm.nih.gov/bioproject/PRJNA981220/">https://www.ncbi.nlm.nih.gov/bioproject/PRJNA981220/</a>                                   |
| V3-V4 region of 16S rRNA sequencing data | Smith et al., 2021 [22]       | <a href="https://www.ncbi.nlm.nih.gov/bioproject/PRJNA714242/">https://www.ncbi.nlm.nih.gov/bioproject/PRJNA714242/</a>                                   |
| V4 region of 16S rRNA sequencing data    | Hurst et al., 2022 [30]       | <a href="https://www.ncbi.nlm.nih.gov/bioproject/PRJNA703574/">https://www.ncbi.nlm.nih.gov/bioproject/PRJNA703574/</a>                                   |
| <b>Script</b>                            |                               |                                                                                                                                                           |
| Script used for this study               | This study                    | <a href="https://github.com/David-microbiomics/Rscript/blob/main/Rscript_16SV4">https://github.com/David-microbiomics/Rscript/blob/main/Rscript_16SV4</a> |
| <b>Software and algorithms</b>           |                               |                                                                                                                                                           |
| R version 4.2.1.                         | R project                     | <a href="https://www.r-project.org/">https://www.r-project.org/</a>                                                                                       |
| DADA2 R package ver. 3.17                | Callahan et al., 2016         | <a href="https://bioconductor.org/packages/release/bioc/html/dada2.html">https://bioconductor.org/packages/release/bioc/html/dada2.html</a>               |
| Wrench R package ver. 1.20.0             | Muthiah and Corrada, 2023     | <a href="https://bioconductor.org/packages/release/bioc/html/Wrench.html">https://bioconductor.org/packages/release/bioc/html/Wrench.html</a>             |
| Phyloseq R package ver. 1.46.0           | Murdie and Holmes, 2013       | <a href="https://bioconductor.org/packages/release/bioc/html/phyloseq.html">https://bioconductor.org/packages/release/bioc/html/phyloseq.html</a>         |
| Microbiome R package ver. 1.18           | Lahti and Shetty, 2019        | <a href="https://bioconductor.org/packages/release/bioc/html/microbiome.html">https://bioconductor.org/packages/release/bioc/html/microbiome.html</a>     |
| Eulerr R package ver. 7.0.0              | Larsson, 2022                 | <a href="https://www.rdocumentation.org/packages/eulerr/versions/7.0.0">https://www.rdocumentation.org/packages/eulerr/versions/7.0.0</a>                 |

|                                            |                        |                                                                                                               |
|--------------------------------------------|------------------------|---------------------------------------------------------------------------------------------------------------|
| Microbiomeutilities R package ver. 1.00.16 | Lahti and Shetty, 2020 | <a href="https://microsud.github.io/microbiomeutilities/">https://microsud.github.io/microbiomeutilities/</a> |
| Ggplot2 R package ver. 3.4.4.              | Wickham, 2016          | <a href="https://ggplot2.tidyverse.org/">https://ggplot2.tidyverse.org/</a>                                   |
| Ggstatsplot R package ver. 0.9.4           | Patil, 2021            | <a href="https://indrajeetpatil.github.io/ggstatsplot/">https://indrajeetpatil.github.io/ggstatsplot/</a>     |
| Gtsummary R package ver. 1.6.2             | Sjoberg et al., 2021   | <a href="https://www.danielsjoberg.com/gtsummary/">https://www.danielsjoberg.com/gtsummary/</a>               |

### Nasopharyngeal Swab

Nasopharyngeal swab (NPS) specimens (n = 207) were collected from adult individuals. The sample collection followed the protocol outlined by Marti et al., as detailed in N Engl J Med 2020;382:e76, DOI: 10.1056/NEJMvcm2010260. Sterile nylon-tipped swabs were used for the collection. The specimens were then placed in UTM® (Universal Transport Medium™). Duplicate samples were obtained, with one of them being subjected to SARS-CoV-2 testing at the National Institute for Respiratory Diseases in the Molecular Biology Laboratory through RT-PCR assay. The remaining nasopharyngeal sample was stored at -70°C until DNA extraction.

### DNA Extraction

The samples positive for SARS-CoV-2 were centrifuged for 20 min at 14,000 RPM. The pellet was resuspended in 500 µl of Sputolysin® (Calbiochem, Germany) mixed and incubated at room temperature for 15 min. Subsequently, they were centrifuged for 5 minutes at 1500 rpm, discarding the supernatant. DNA was extracted with the QIAmp UCP pathogen miniKit (Qiagen), <https://www.qiagen.com/es-us/products/discovery-and-translational-research/dna-rna-purification/dna-purification/microbial-dna/qiaamp-ucp-pathogen-mini-kit>, following the mechanical pre-lysis with spin protocol for swabs, except proteinase K was extended to 20 min.

### 16S rRNA Amplicon PCR

Subsequently, the DNA V4 region of 16S rRNA was amplified by PCR using the primers 515f and 806r. 50 ng of template DNA was amplified with Phusion Plus Master Mix (Thermo Fisher, USA) using 2.5 µl of both forward and reverse primers [0.2µM]. PCR conditions were as follows: initial denaturation 95 °C/15 min, followed by 25 cycles of denaturation 95°C/30s, aneling 60°C/30s and polymerization 72°C/2 min. After that, final polymerization was carried out at 72 °C/10 min. PCR products were purified using DNA Clean &Concentrator (Zymo, USA).

### Sequencing

Samples were pooled and barcoded following Illumina 16S metagenomics protocol (Illumina, USA), [https://support.illumina.com/downloads/16s\\_metagenomic\\_sequencing\\_library\\_preparation.html](https://support.illumina.com/downloads/16s_metagenomic_sequencing_library_preparation.html). The barcodes were pooled in equimolar concentration and sequenced on the Illumina Miseq platform using the 2X250 pair-end method.

### Deposited data

The raw V4 region of 16S rRNA sequencing data of this study has been deposited in the NCBI Bioproject database under accession number **PRJNA981220**.

## R script

```
#####  
Modified from the DADA2 tutorial https://benjjneb.github.io/dada2/tutorial.html  
#####  
#####  
# Install DADA2  
#https://benjjneb.github.io/dada2/dada-installation.html  
#if (!requireNamespace("BiocManager", quietly = TRUE))  
# install.packages("BiocManager")  
#BiocManager::install("dada2", version = "3.17")  
#Install phyloseq  
# https://joey711.github.io/phyloseq/  
# Install ggplot2  
# https://ggplot2.tidyverse.org/  
##BiocManager::install("Wrench")  
#####  
  
#Load packages  
library(dada2)  
library(phyloseq)  
library(ggplot2)  
library(microbiome)  
library(knitr)  
library(Wrench)  
library(RColorBrewer)  
library(ggstatsplot)  
library(eulerr)  
  
path <- "~/git_script" # CHANGE ME to the directory containing the fastq files after unzipping.  
list.files(path)  
  
#The forward and reverse read files have the following format: NAME_1.fastq.gz and  
NAME_2.fastq.gz  
  
fnFs <- sort(list.files(path, pattern="_1.fastq.gz", full.names = TRUE))  
fnRs <- sort(list.files(path, pattern="_2.fastq.gz", full.names = TRUE))  
  
# We extract the name of the sequences assuming that they have the format NAME_X.fastq.gz  
  
sample.names <- sapply(strsplit(basename(fnFs), "_"), `[`, 1)  
  
##QUALITY CONTROL OF SEQUENCES  
  
plotQualityProfile(fnFs[1:6])  
plotQualityProfile(fnRs[1:6])  
  
# Assign the filenames for the filtered fastq.gz files.  
filtFs <- file.path(path, "filtered", paste0(sample.names, "_F_filt.fastq.gz"))  
filtRs <- file.path(path, "filtered", paste0(sample.names, "_R_filt.fastq.gz"))  
names(filtFs) <- sample.names  
names(filtRs) <- sample.names
```

```

# We Filter
out <- filterAndTrim(fnFs, filtFs, fnRs, filtRs, truncLen=c(242,246),
                    maxN=0, maxEE=c(2,2), truncQ=2, rm.phix=TRUE,
                    compress=TRUE, multithread=TRUE) # Windows multithread=FALSE

head(out)

#Learn the Error Rates.

errF <- learnErrors(filtFs, multithread=TRUE)
errR <- learnErrors(filtRs, multithread=TRUE)

plotErrors(errF, nominalQ=TRUE)
plotErrors(errR, nominalQ=TRUE)

dadaFs <- dada(filtFs, err=errF, multithread = TRUE)
dadaRs <- dada(filtRs, err=errR, multithread = TRUE)

#Inspecting the returned dada-class object:
dadaFs[[1]]
dadaRs[[1]]

#Merge paired reads

mergers <- mergePairs(dadaFs, filtFs, dadaRs, filtRs, verbose=TRUE)
head(mergers[[1]])

#Construct sequence table

seqtab <- makeSequenceTable(mergers)
dim(seqtab)

table(nchar(getSequences(seqtab)))

#Remove chimeras

seqtab.nochim <- removeBimeraDenovo(seqtab, method="consensus", multithread=TRUE,
verbose=TRUE)
dim(seqtab.nochim)
sum(seqtab.nochim)/sum(seqtab)

#Track reads through the pipeline

getN <- function(x) sum(getUniques(x))
track <- cbind(out, sapply(dadaFs, getN), sapply(dadaRs, getN), sapply(mergers, getN),
rowSums(seqtab.nochim))
colnames(track) <- c("input", "filtered", "denoisedF", "denoisedR", "merged", "nonchim")

```

```
rownames(track) <- sample.names
head(track)
```

```
#Assign taxonomy
```

```
taxa <- assignTaxonomy(seqtab.nochim, "~/silva_nr99_v138.1_train_set.fa.gz", multithread=TRUE)
taxa <- addSpecies(taxa, "~/silva_species_assignment_v138.1.fa.gz")
```

```
taxa.print <- taxa
rownames(taxa.print) <- NULL
head(taxa.print)
```

```
#export files to csv to create phyloseq
setwd("~/git_script/")
trans_seqtab_nochimZ = data.frame(t(seqtab.nochim))
write.csv(trans_seqtab_nochimZ, file="asv_table.csv")
write.csv(taxa, file="tax_table.csv")
```

```
#####
#We now construct a phyloseq object directly from the dada2 outputs.
```

```
#####
```

```
#We assign the tables to their variables
asv_mat = asv_table
tax_mat = tax_table
samples_df = sample_data #Incorporate the metadata
```

```
#We transform to matrix
asv_mat <- as.matrix(asv_mat)
tax_mat <- as.matrix(tax_mat)
```

```
#transform to phyloseq objects
ASV = otu_table(asv_mat, taxa_are_rows = TRUE)
TAX = tax_table(tax_mat)
samples = sample_data(samples_df)
```

```
ps_omega = phyloseq(ASV, TAX, samples)
```

```
#preprocessing
#We remove the ASV with NA in Genus
ps_omega <- subset_taxa(ps_omega, !is.na(Genus))
```

```
#We consolidate by genus
(merge_omega <- tax_glom(ps_omega, taxrank="Genus"))
merge_omega
```

```
#We remove taxa that add up to less than 10 reads among all samples
ps_omega <- prune_taxa(taxa_sums(merge_omega) > 10, merge_omega)
```

```
##### Normalization with Wrench#####
```

```

count_tab <- as.matrix(data.frame(otu_table(ps_omega)))
groupx <- sample_data(ps_omega)$COVID_severity
W <- wrench(count_tab, condition=groupx)
norm_factors <- W$nf
asv_wrench <- sweep(count_tab, 2, norm_factors, FUN = '/')
asv_wrench <- round(asv_wrench)

#the new standardized table is incorporated to phyloseq
ps_Wnorm <- ps_omega
otu_table(ps_Wnorm) <- otu_table(asv_wrench, taxa_are_rows = TRUE)
ps_Wnorm

#ASVs that are at 0 are removed
ps_Wnorm <- prune_taxa(taxa_sums(ps_Wnorm) > 0, ps_Wnorm)

##### phyloseq with relative abundances #####

asv.relative_W <- abundances(ps_Wnorm, "compositional")
ps_W_relative <- ps_Wnorm
otu_table(ps_W_relative) <- otu_table(asv.relative_W, taxa_are_rows = TRUE)
ps_W_relative

#####

#CHARTS

#####

microbiomePalette <- c('#a6cee3', '#1f78b4', '#b2df8a', '#33a02c', '#84de02', '#ff6037',
'#aaa500', '#cab2d6', '#6a3d5a', '#391285', '#b15928', '#e41a1c', '#ffa6c9', '#ff3399', '#00cc99',
'#5e8c31', '#933709', '#ff7a00', '#ffdf46', '#01665e', '#35978f')

#categorization by COVID severity
samples_df$COVID_severity = factor (samples_df $ COVID_severity, levels = c ('control', "severe",
'critical'))
samples <- sample_data (samples_df)
sample_data(ps_W_relative) <- sample_data(samples)
ps_W_relative

#top 20 genus
top20 <- names(sort(taxa_sums(ps_W_relative), decreasing=TRUE))[1:20]
ps.top20 <- transform_sample_counts(ps_Wnorm, function(OTU) OTU/sum(OTU))
ps.top20 <- prune_taxa(top20, ps.top20)

p4 <- plot_bar(ps.top20, fill = "Genus") +
  facet_wrap(~COVID_severity, scales="free_x")
p4 + geom_bar(aes(color=NULL, fill= Genus), stat="identity", position="stack") +
  scale_fill_manual(values = microbiomePalette) +
  theme(panel.ontop = FALSE,
        text=element_text(size=20),
        axis.text=element_text(size=15),
        axis.title=element_text(size=15),

```

```
plot.title=element_text(size=15),
legend.text=element_text(size=20),
legend.title=element_text(size=20)) +
labs(x = "", y = "Relative abundance" )
```

```
##### Alpha diversity #####
```

```
pseq_W = ps_Wnorm
tab_W = alpha(pseq_W, index = "all")
plot_richness(pseq_W)
```

```
##### Beta diversity #####
```

```
ps.prop <- transform_sample_counts(ps_Wnorm, function(otu) otu/sum(otu))
ord.nm.ds.bray <- ordinate(ps.prop, method="NMDS", distance="bray")
op <- plot_ordination(ps.prop, ord.nm.ds.bray, color="COVID_severity", title="Bray NMDS")
print(op)
```

```
##### Comparison of taxonomic groups by COVID Severity #####
```

```
#We manually create megadata_W with, alpha diversity indices, metadata and relative abundance by
genus.
```

```
megadata_W$COVID_severity = factor (megadata_W$ COVID_severity, levels = c ('control', "severe",
'critical'))
```

```
violinpalette <- c("#4393c3", "#4d9221", "#b2182b")
```

```
q23 <- ggbetweenstats(
  data= megadata_W,
  x= "COVID_severity",
  y= "Lawsonella",
  type = "np",
  xlab= "Patients by severity",
  ylab= "Lawsonella relative abundance",
  plot.type= "boxviolin",
  centrality.plotting = FALSE,
  centrality.point.args = list (size = 5, color = "darkred"),
  centrality.label.args = list (size = 4, nudge_x = 0.4, segment.linetype = 4,
    min.segment.length = 0),
  ggsignif.args = list(textsize = 0, tip_length = 0.01),
  violin.args = list(scale = "width", size = 1, aes(fill = COVID_severity),alpha = 0.8),
  ggtheme = theme(panel.background = element_rect(fill = NA),
    panel.grid.major = element_line(colour = "#ffffff"),
    panel.ontop = FALSE,
    text=element_text(size=15),
    axis.text=element_text(size=15),
    axis.title=element_text(size=15),
    plot.title=element_text(size=10),
    legend.text=element_text(size=100),
    legend.title=element_text(size=10)))
q23 + scale_fill_manual(values = violinpalette)
```

#And the parameters were changed for each taxonomic group or index

##### Core Microbiome #####

```
disease_states <- unique(as.character(meta(ps_W_relative)$COVID_severity))  
print(disease_states)
```

```
list_core <- c()
```

```
for (n in disease_states){  
  ps.sub <- subset_samples(ps_W_relative, COVID_severity == n)  
  core_m <- core_members(ps.sub,  
                        detection = 0.001,  
                        prevalence = 0.60)  
  print(paste0("No. of core taxa in ", n, " : ", length(core_m)))  
  list_core[[n]] <- core_m  
}  
print(list_core)
```

```
mycols <- c(nonCRC="#d6e2e9", CRC="#cbf3f0", H="#fcf5c7")  
plot(venn(list_core),  
     fills = mycols)
```

#####
