# Supplementary material for: Microbiome in the nasopharynx: Insights into the impact of COVID-19 severity
Source: PubMed Central journal article supplement — Heliyon. 2024 May 18;10(10):e31562. doi: 10.1016/j.heliyon.2024.e31562 (PMC11141365; doi:10.1016/j.heliyon.2024.e31562), 2024-05-18
Supplement: mmc2.pdf [file mmc2.pdf]

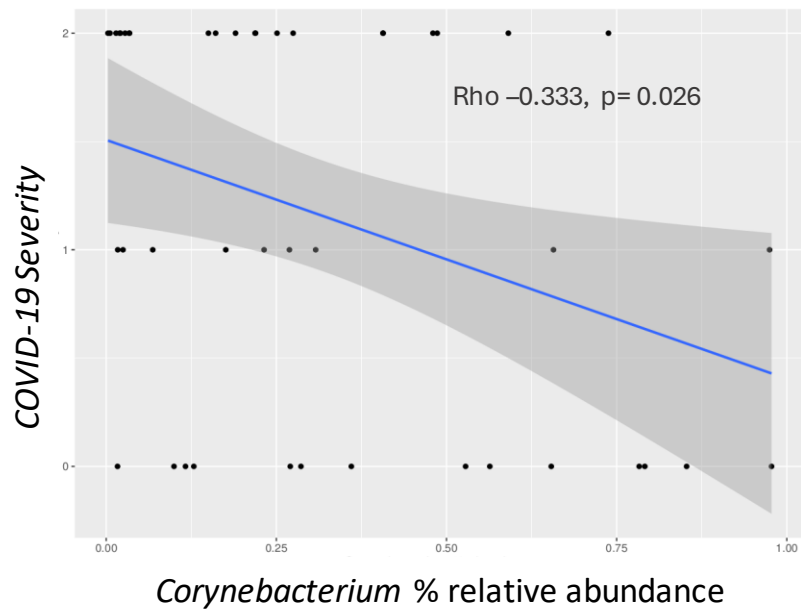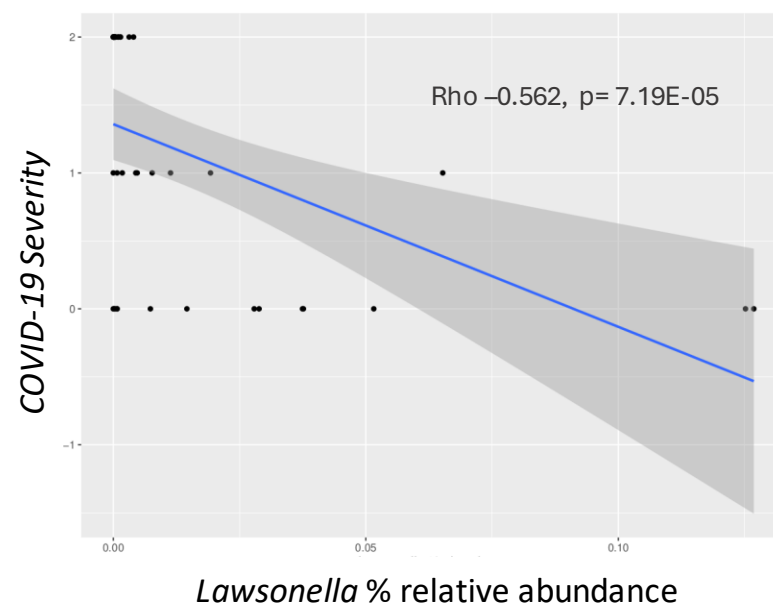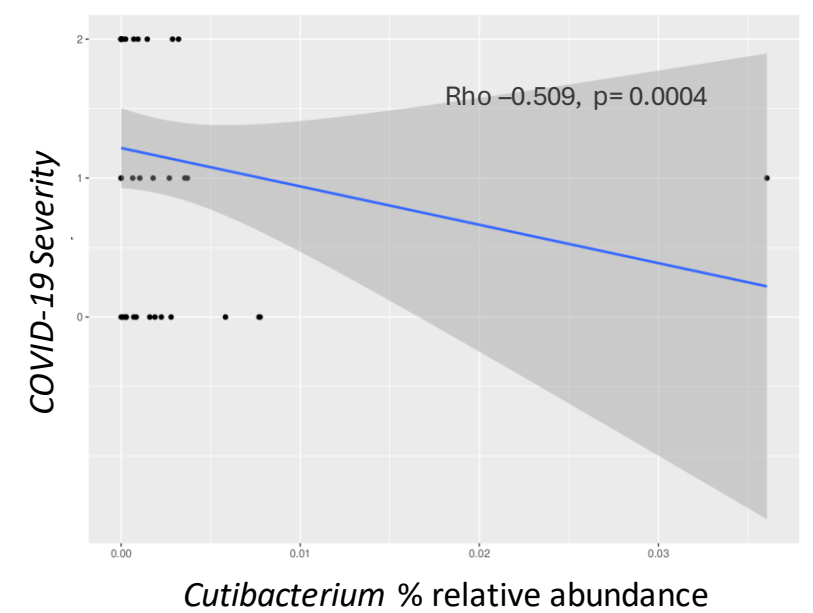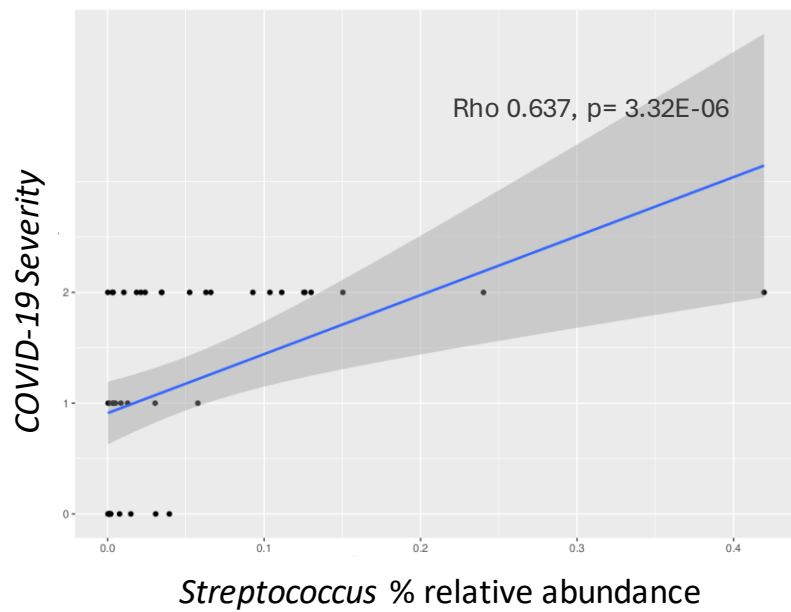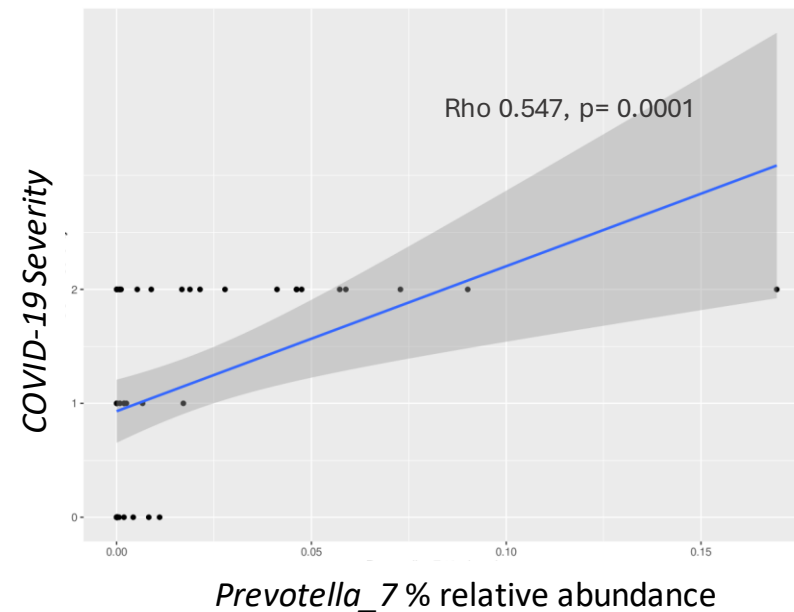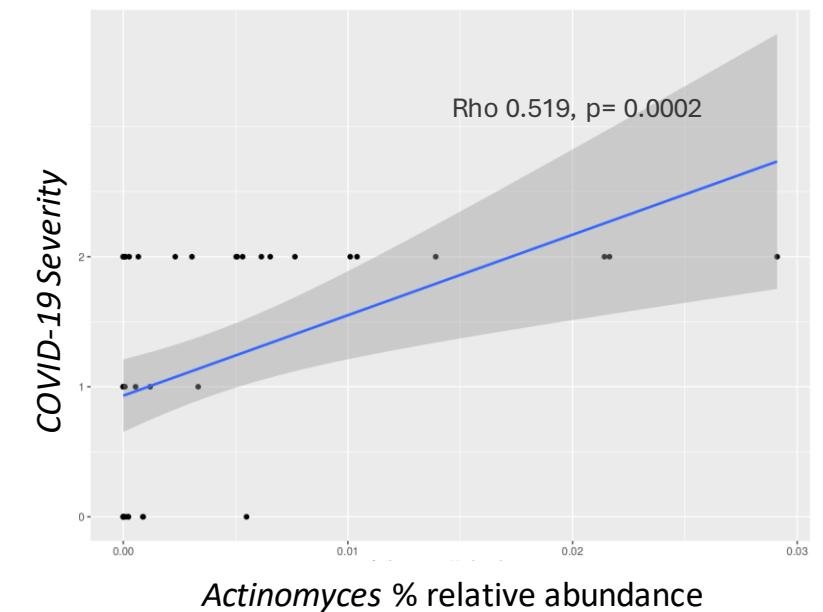

**Supp Fig. 1|** Spearman's correlations between relative abundance and COVID-19 severity. COVID-19 Severity was categorized into three ordinal levels: controls assigned a value of 0, moderate COVID-19 cases assigned a value of 1, and critical COVID-19 cases assigned a value of 2.

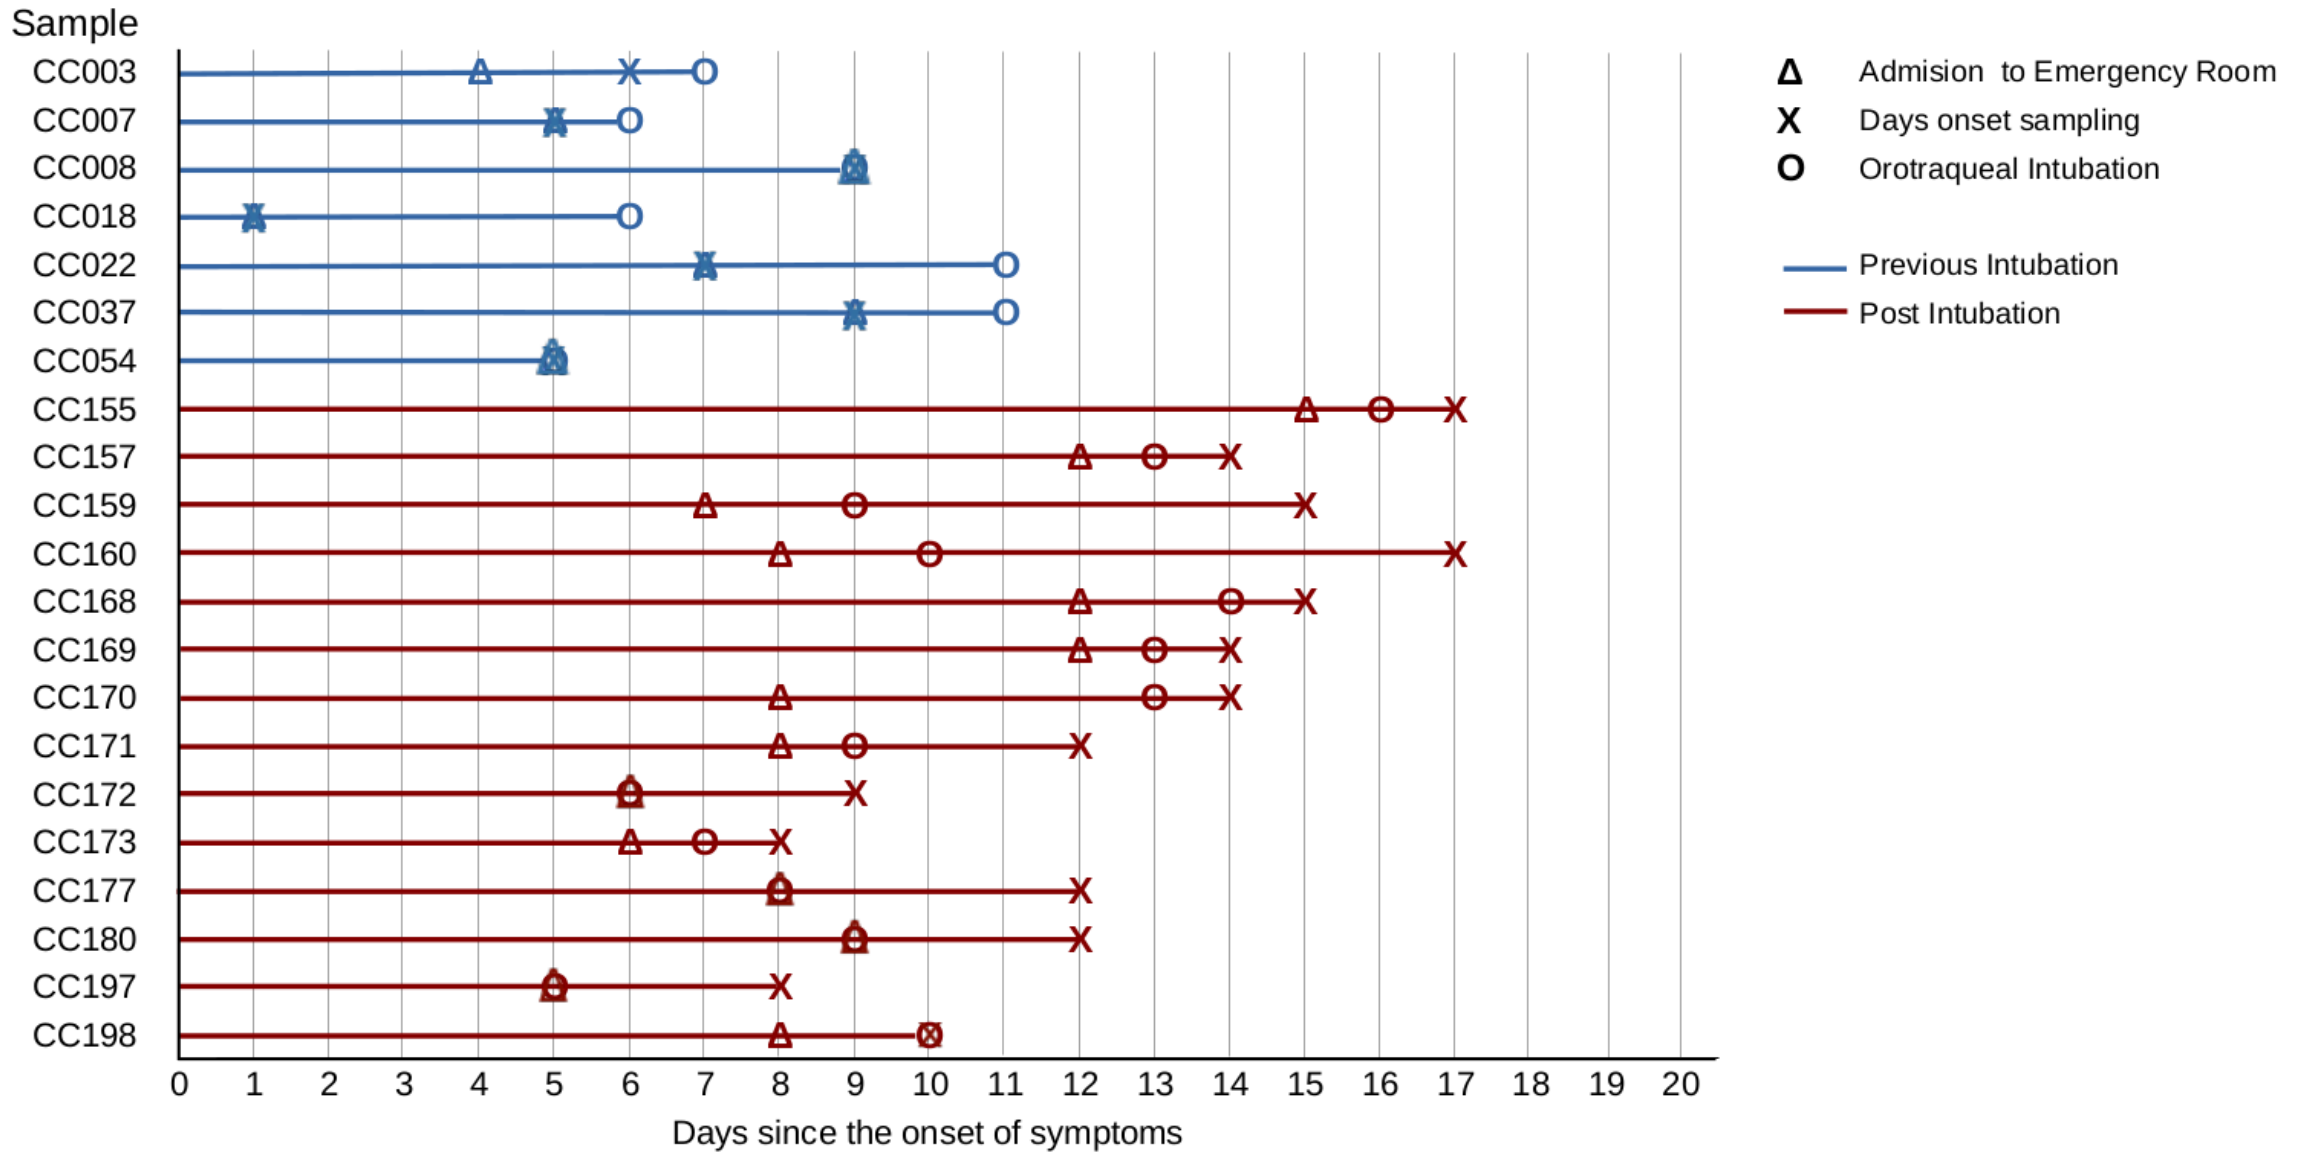

**Supp Fig. 2|** Study timeline illustrating key events for study participants, including the day of admission to the emergency room, the day of sample collection, and the day of oro-tracheal tube placement.

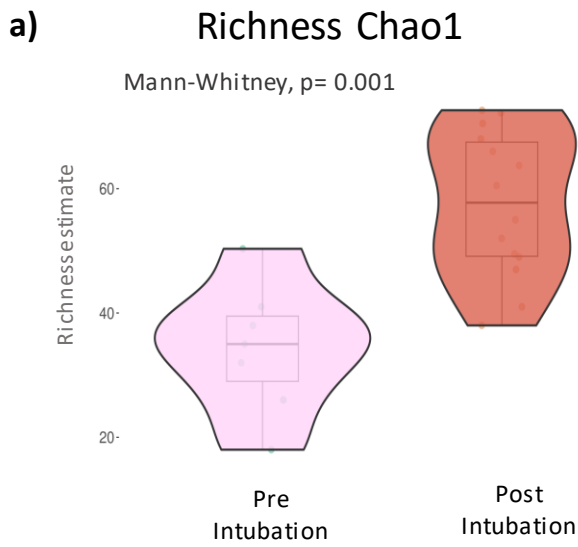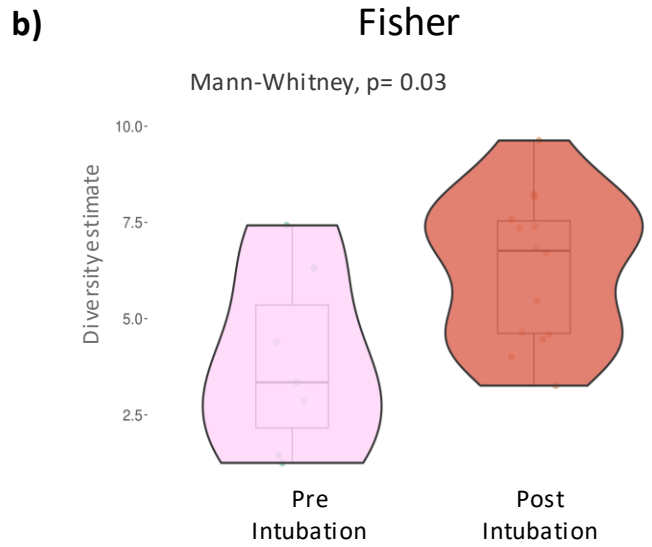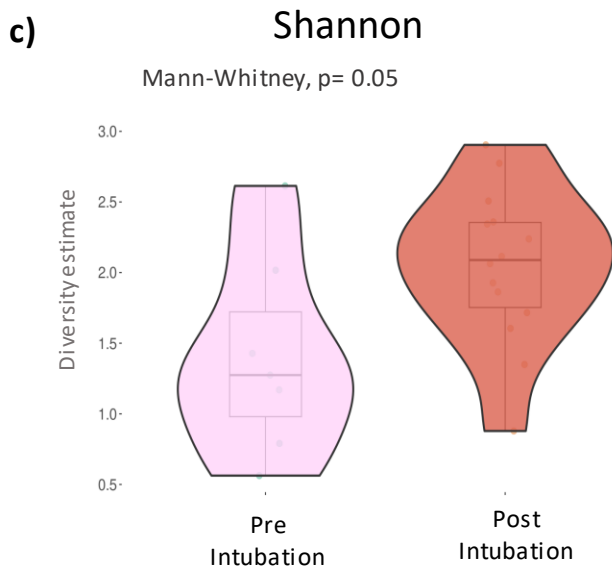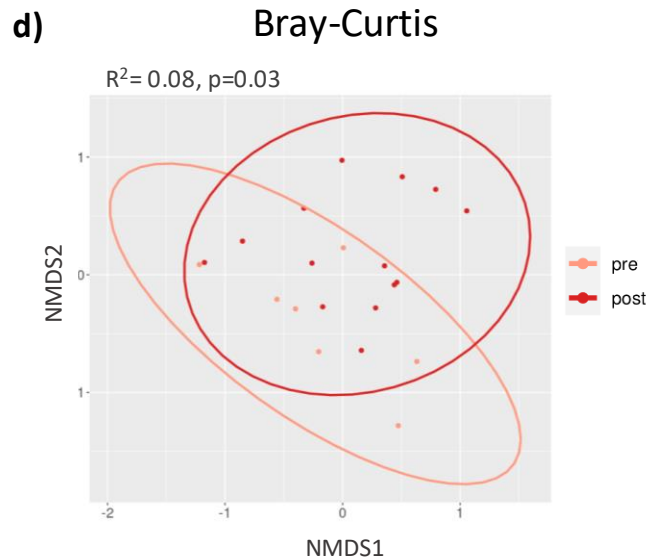

**Supp Fig. 3|** Richness and alpha diversity indices. a) Richness Chao1 index, b) Fisher index, and c) Shannon index show a significant difference between the pre and post orotracheal tube placement. d) Beta diversity of the nasopharyngeal microbiome among pre and post-intubation. Significance was determined using the Mann-Whitney test with a 95% confidence interval. The NMDS plot is based on Bray-Curtis dissimilarity, and PERMANOVA statistics indicate a significant difference among the groups. Each color represents a specific analyzed group.

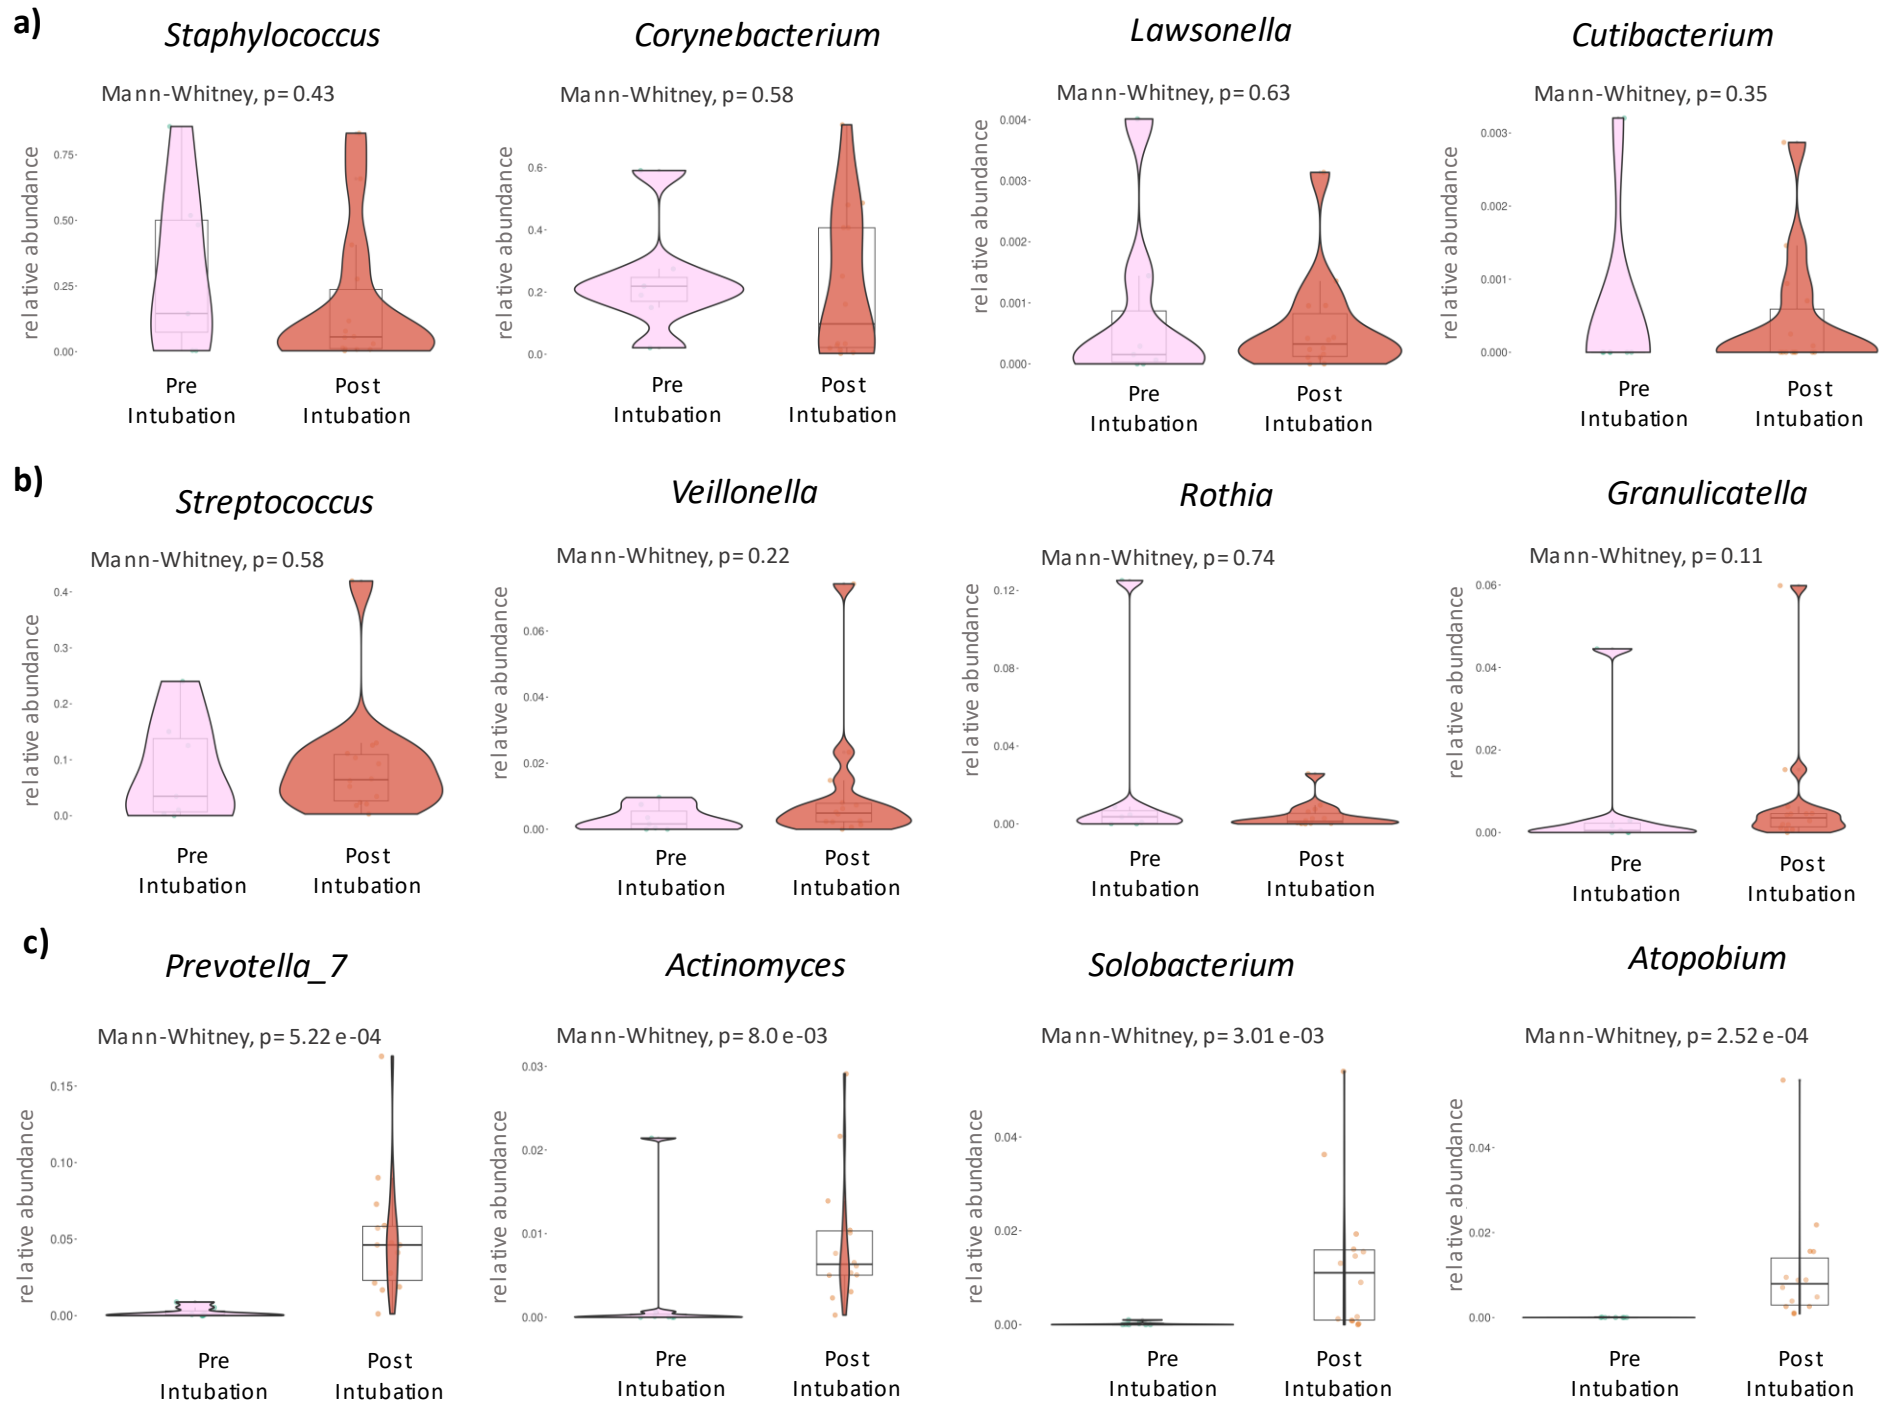

**Supp Fig. 4** | Differences in the relative abundance of bacterial genera associated with orotracheal tube placement. a) Violin plot displaying the relative abundance of *Staphylococcus*, *Corynebacterium*, *Lawsonella*, and *Cutibacterium* genera. No significant differences were observed between the pre and post-intubation groups. b) Genera detected with significance in critically ill COVID-19 patients but without significant differences by intubation. c) Microorganisms increased after the intubation procedure. Significance was determined using the Mann-Whitney test with a 95% confidence interval.
